# Supplementary material
Source: publisher figshare collection journal article supplement (https://tandf.figshare.com/ndownloader/files/12774440)
Supplement: Supplementary file 1 [file 12774440]

Supporting Information

Synthesis, X-ray characterization and *in vitro* biological approach of dimeric and polymeric mercury(II) complexes with α-keto stabilized sulfur ylide

SEYYED JAVAD SABOUNCHEI*, MOJDEH SADAT HASHEMI, ROYA KARAMIAN, SEYED HAMED MOAZZAMI FARIDA, PARVIZ GOHARI DERAKHSHANDEH, ROBERT W. GABLE and KRISTOF VAN HECKE*

| ***Table of Contents*** | ***Page number*** |
| --- | --- |
| *S1. Characterization data for* ***S*** | *S2* |
| *S2. Characterization data for* ***Y*** | *S5* |
| *S3. Characterization data for* ***1*** | *S8* |
| *S4. Characterization data for* ***2*** | *S11* |
| *S5. Characterization data for* ***3*** | *S14* |
| *S6. Characterization data for* ***4*** | *S17* |
| *S7. Table S1*  *S8. Table S2* | *S20*  *S20* |
| *S9. Table S3* | *S21* |

**S1. *Synthesis of [(Me)2SCH2C(O)C6H4-p-CN]Br (S):***

Yield: 90% (0.13 g); Decomposition at: 158-162 ºC. The product was characterized on the basis of 1H, 13C NMR and CHNS analysis data that well fitted its structure. *Anal*. Calc. for C11H12SBrON (%): C, 46.16; H, 4.23; S, 11.20. Found: C, 46.32; H, 4.39; S, 11.36. IR (KBr disk): ν (cm-1) 1688 (C=O); 831 (S+-C-) and 2234.76 (CN). 1H NMR (DMSO-d6, ppm): δ 3.02 (s, 6H, S(CH3)2); 5.64 (s, 2H, CH2); 7.92-8.23 (m, 4H, Ph). 13C NMR (DMSO-*d*6, ppm): δ 26.64 (s, S(CH3)2); 54.92 (s, CH2); 115.35 (s, CN); 116.21 (s, Ph); 117.09 (s, Ph); 118.82 (s, Ph); 119.04 (s, Ph); 195.88 (s, CO).

**Figure S1**. The 1H NMR spectrum of product (**S**).

**Figure S2.** The 13C NMR spectrum of product (**S**).


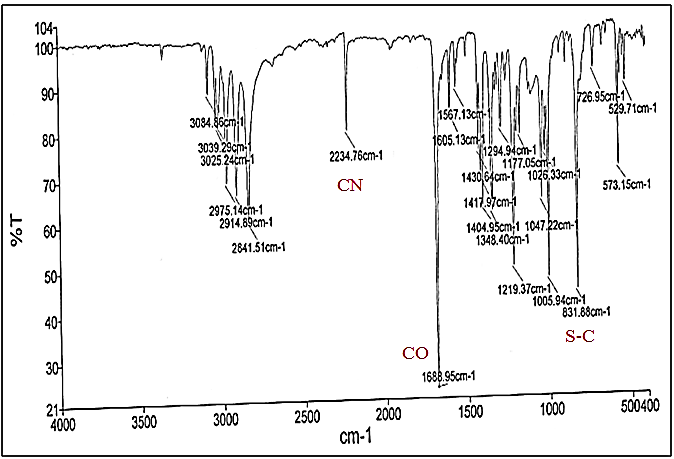


**Figure S3.** The IR spectrum of product (**S**).

**S2. *Synthesis of (Me)2SC(H)C(O)C6H4-p-CN (Y):***

Yield: 70% (0.09 g); Decomposition at: 165-167 ºC. The product was characterized on the basis of 1H, 13C NMR, CHNS analysis data that well fitted its structure. *Anal*. Calc. for C11H11NOS (%): C, 64.36; H, 5.40; S, 15.62. Found: C, 64.42; H. 5.46; S, 15.69. IR (KBr disk): ν (cm-1) 1572 (C=O), 861.31 (S+-C-) and 2225.61 (CN). 1H NMR (DMSO-d6, ppm): δ 2.95 (s, 6H, S(CH3)2); 4.31 (s, 1H, CH); 7.24-7.81 (m, 4H, Ph). 13C NMR (DMSO-*d*6, ppm): δ 26.75 (s, S(CH3)2); 53.25 (s, CH); 112.55 (s, CN); 118.94 (s, Ph); 126.42 (s, Ph); 131.80 (s, Ph); 145.01 (s, Ph); 180.33 (s, CO).

**Figure S4.** The 1H NMR spectrum of product (**Y**).

**Figure S5.** The 13C NMR spectrum of product (**Y**).


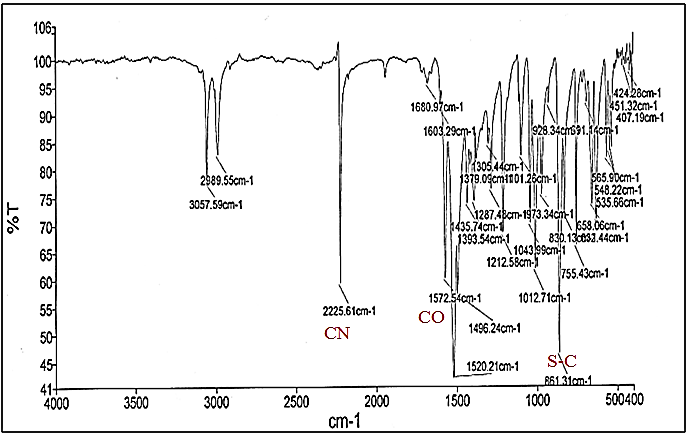


**Figure S6.** The IR spectrum of product (**Y**).

**S3. *Synthesis of [(Y)HgCl2]2 (1):***

Yield 0.2 g, 92%. *Anal*. Calc. for C22H22Cl4Hg2N2O2S2 (%): C, 27.71; H, 2.33; S, 6.73; N, 2.94. Found: C, 27.80; H, 2.42; S, 6.80; N, 3.03. Decomposition at: 208–210 ºC. IR (KBr disk): ν(cm-1) 1655 (CO); 856 (C--S+) and 2237 (CN). 1H NMR (DMSO-*d*6, ppm): δ 2.91 (s, 6H, S(CH3)2); 5.49 (s, 1H, CH); 7.91-8.11 (m, 4H, Ph). 13C NMR (DMSO-*d*6, ppm): δ 27.12 (s, S(CH3)2); 64.58 (s, CH); 115.22 (s, CN); 118.60 (s, Ph); 128.63 (s, Ph); 132.93 (s, Ph); 139.13 (s, Ph); 190.56 (s, CO).

**Figure S7.** The 1H NMR spectrum of product (**1**).

**Figure S8.** The 13C NMR spectrum of product (**1**).


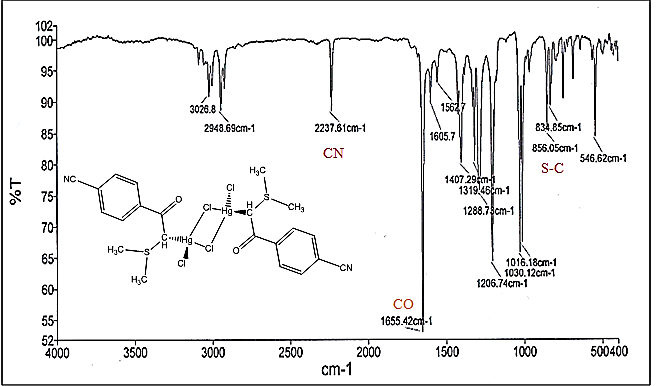


**Figure S9.** The IR spectrum of product (**1**).

**S4. *Synthesis of [(Y)HgBr2]2 (2):***

Yield 0.2 g, 89%. *Anal*. Calc. for C22H22Br4Hg2N2O2S2 (%): C, 23.36; H, 1.96; S, 5.67; N, 2.48. Found: C, 23.54; H, 2.14; S, 5.85; N, 2.66. Decomposition at: 200–202 ºC. IR (KBr disk): ν(cm-1) 1653 (CO); 745 (C--S+) and 2237 (CN). 1H NMR (DMSO-*d*6, ppm): δ 2.89 (s, 6H, S(CH3)2); 5.43 (s, 1H, CH); 7.92-8.11 (m, 4H, Ph). 13C NMR (DMSO-*d*6, ppm): δ 27.21 (s, S(CH3)2); 64.52 (s, CH); 114.98 (s, CN); 118.67 (s, Ph); 128.60 (s, Ph); 132.90 (s, Ph); 139.69 (s, Ph); 189.58 (s, CO).

**Figure S10.** The 1H NMR spectrum of product (**2**).

**Figure S11.** The 13C NMR spectrum of product (**2**).


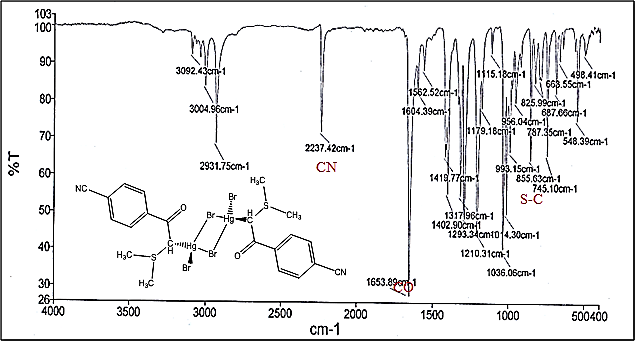


**Figure S12.** The IR spectrum of product (**2**).

**S5. *Synthesis of [(Y)HgI2]2 (3):***

Yield 0.2 g, 87%. *Anal*. Calc. for C22H22I4Hg2N2O2S2 (%): C, 20.03; H, 1.68; S, 4.86; N, 2.12. Found: C, 20.21; H, 1.82; S, 5.04; N, 2.3. Decomposition at: 186–188 ºC. IR (KBr disk): ν(cm-1) 1640 (CO); 825 (C--S+) and 2234 (CN). 1H NMR (DMSO-*d*6, ppm): δ 2.90 (s, 6H, S(CH3)2); 5.32 (s, 1H, CH); 7.74-8.12 (m, 4H, Ph). 13C NMR (DMSO-*d*6, ppm): δ 27.35 (s, S(CH3)2); 64.22 (s, CH); 114.65 (s, CN); 118.57 (s, Ph); 128.57 (s, Ph); 132.85 (s, Ph); 140.37 (s, Ph); 188.35 (s, CO).

**Figure S13.** The 1H NMR spectrum of product (**3**).

**Figure S14.** The 13C NMR spectrum of product (**3**).


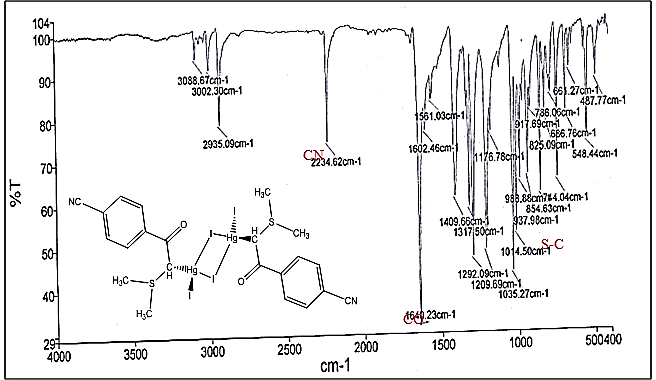


**Figure S15.** The IR spectrum of product (**3**).

**S6. *Synthesis of [(Y). Hg(NO3)2]n******(4):***

Yield 0.2 g, 91%. *Anal*. Calc. for C11H11O7N3SHg (%): C, 24.93; H, 2.09; S, 6.05; N, 7.93. Found: C, 25.09; H, 2.27; S, 6.23; N, 8.11. Decomposition at: 193–195 ºC. IR (KBr disk): ν(cm-1) 1661 (CO); 1384 (NO); 858 (C--S+) and 2234 (CN). 1H NMR (DMSO-*d*6, ppm): δ 2.71, 2.98 (s, 6H, S(CH3)2); 5.51- 5.97 (d, 1H, CH); 7.61-8.33 (m, 4H, Ph). 13C NMR (DMSO-*d*6, ppm): δ 26.95 (s, S(CH3)2); 60.36, 67.55 (s, CH); 115.23 (s, CN); 114.10 (s, Ph); 121.18 (s, Ph); 121.65 (s, Ph); 130.86 (s, Ph); 135.8 (s, Ph); 160.15 (s, Ph); 192.10, 194.57 (s, CO).

**Figure S16.** The 1H NMR spectrum of product (**4**).

**Figure S17.** The 13C NMR spectrum of product (**4**).


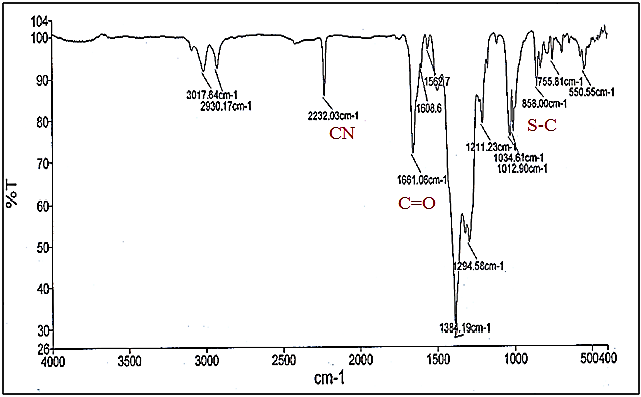


**Figure S18.** The IR spectrum of product (**4**).

**S7. Selected bond lengths (Å) and bond angles (º) for Y:**

**Table S1.** Selected bond lengths (Å) and bond angles (º) for **Y**.

| Bond type | Bond length | Angle type | Bond angles |
| --- | --- | --- | --- |
| S1‒C1 | 1.7127 (12) | Cl‒ S1‒ C10 | 106.90 (6) |
| S1‒C10 | 1.8002 (13) | C1‒ S1‒ C11 | 107.93 (6) |
| S1‒C11 | 1.7993 (12) | C11‒ S1‒ C10 | 99.00 (6) |
| O1‒C2 | 1.2596 (14) | O1‒ C2‒ C1 | 124.96 (11) |
| N1‒C9 | 1.1470 (17) | N1‒ C9‒ C6 | 179.13 (13) |
| C1‒C2 | 1.3962 (16) | C10‒ H10‒ N1a | 179.7 |
| C2‒C3 | 1.5148 (15) | C10‒ H10‒ O1 | 123.2 |
| C6‒C9 | 1.4427 (16) | C11‒H11‒O1b | 163.5 |

See figure 1 Symmetry code; a: -X, 1/2+Y, 3/2-Z; b: 1+X, +Y, +Z;

**Y**:(Me)2SC(H)C(O)C6H4-*p*-CN

***S8.* Selected bond lengths (Å) and bond angles (º) for 1:**

**Table S2.** Selected bond lengths (Å) and bond angles (º) for **1**.

| Bond type | Bond length | Angle type | Bond angles |
| --- | --- | --- | --- |
| Hg1‒C1 | 2.164 (6) | Cl1‒ Hg1‒ Cl2 | 100.78 (5) |
| Hg1‒Cl1 | 2.3854 (16) | Cl1‒ Hg1‒ Cl2a | 94.18 (5) |
| Hg1‒Cl2 | 2.6915 (15) | S1‒ C1‒ Hg1 | 109.8 (3) |
| Hg1‒Cl2a | 2.7536 (17) | C4‒ C1‒ Hg1 | 108.0 (4) |
| N1‒C11 | 1.148 (10) | C1‒ Hg1‒ Cl2 | 109.28 (17) |
| C2‒S1 | 1.791 (7) | C1‒ Hg1‒ Cl2a | 110.53 (18) |
| C4‒O1 | 1.231 (9) | C1‒ Hg1‒ Cl1 | 142.34 (17) |

See figure 2 for the atom numbering. Symmetry code; a: 1-X,

1-Y, -Z; **1**: [(Y)HgCl2]2

**S9. Scavenging activity (%) of [HgX2(Y)]2 (Y: (Me)2SC(H)C(O)C6H4-*p*-CN, X: Cl (1), Br (2), I (3) and NO3 (4) at different concentrations (M), quercetin and ascorbic acid as standard antioxidants.**

**Table S3.** a Experiment was performed in triplicate and expressed as mean ± SD.

| Sample | | Concentration (M) and Scavenging activity (%) | | | | |
| --- | --- | --- | --- | --- | --- | --- |
| Y | Concentration (M) | 9.8×10-4 | 19.5×10-4 | 29.3×10-4 | 39×10-4 | 48.8×10-4 |
| Scavenging activity (%) | 61.20±1.65 | 65.47±0.70 | 70.83±1.15 | 75.04±1.37 | 80.12±0.54 |
| 1 | Concentration (M) | 2.1×10-4 | 4.2×10-4 | 6.3×10-4 | 8.4×10-4 | 10.5×10-4 |
| Scavenging activity(%) | 53.50±0.73 | 48.26±0.14 | 64.80±1.15 | 68.33±0.64 | 71.40±0.73 |
| 2 | Concentration (M) | 1.8×10-4 | 3.5×10-4 | 5.3×10-4 | 7.1×10-4 | 8.8×10-4 |
| Scavenging activity (%) | 54.73±1.01 | 57.80±0.79 | 56.38±0.76 | 56.57±0.25 | 57.28±0.25 |
| 3 | Concentration (M) | 1.5×10-4 | 3×10-4 | 4.5×10-4 | 6.1×10-4 | 7.6×10-4 |
| Scavenging activity (%) | 61.01±1.22 | 60.82±0.45 | 57.60±0.59 | 60.39±0.88 | 59.27±0.36 |
| 4 | Concentration (M) | 3.8×10-4 | 7.5×10-4 | 11.3×10-4 | 15.1×10-4 | 18.9×10-4 |
| Scavenging activity (%) | 45.79±0.65 | 45.89±0.31 | 43.06±0.63 | 46.44±0.57 | 53.40±0.49 |
| Ascorbic acid | Concentration (M) | 11.4×10-4 | 22.7×10-4 | 34.1×10-4 | 45.4×10-4 | 56.8×10-4 |
| Scavenging activity (%) | 71.47±1.00 | 73.75±0.9 | 77.07±1.51 | 78.86±1.53 | 80.89±1.09 |
| Quercetin | Concentration (M) | 6.6×10-4 | 13.2×10-4 | 19.9×10-4 | 26.5×10-4 | 33.1×10-4 |
| Scavenging activity (%) | 76.11±0.69 | 81.13±1.01 | 86.85±1.81 | 88.13±0.92 | 91.85±1.32 |
